# Supplementary material
Source: Research Square preprint supplement (doi:10.21203/rs.3.rs-9140660/v1)
Supplement: Supplementary file 1 [file afb79fb0b7073385f60d5560.docx]

**Supplementary Information**

**From cultural bias to critical awareness: LLM-mediated voice dialogue and intercultural competence in Chinese language learners**

**Table of Contents**

- Supplementary Table S1: Intercultural Sensitivity Scale (ISS) Items

- Supplementary Table S2: Cultural Intelligence Scale (CQS) Items

- Supplementary Table S3: LLM Cultural Learning Perception Questionnaire (LCPQ) Items

- Supplementary Table S4: LCPQ Inter-Dimension Pearson Correlation Matrix

- Supplementary Note S1: Complete Prompt Templates for Six Weekly Modules

- Supplementary Note S2: Sample Lesson Plan — Four-Phase Implementation Procedure

**Supplementary Table S1. Intercultural Sensitivity Scale (ISS) Items**

Source: Chen and Starosta (2000). Administered in bilingual Chinese–English format. 5-point Likert scale (1 = Strongly Disagree, 5 = Strongly Agree). (R) = reverse-coded item.

**Supplementary Table S1.** Intercultural Sensitivity Scale (ISS) Items

| **No.** | **Item** | **Dimension** |
| --- | --- | --- |
| 1 | I enjoy interacting with people from different cultures. 我喜欢与来自不同文化的人交流。 | Interaction Engagement |
| 2 | I think people from other cultures are narrow-minded. (R) 我认为来自其他文化的人心胸狭隘。 | Respect for Cultural Differences |
| 3 | I am pretty sure of myself in interacting with people from different cultures. 与来自不同文化的人交流时，我对自己相当有信心。 | Interaction Confidence |
| 4 | I find it very hard to talk in front of people from different cultures. (R) 在与来自不同文化的人交流时，我觉得很难做到善解人意。 | Interaction Attentiveness |
| 5 | I always know what to say when interacting with people from different cultures. 与来自不同文化的人相处时，我总是知道该说什么。 | Interaction Confidence |
| 6 | I can be as sociable as I want to be when interacting with people from different cultures. 与来自不同文化的人交流时，我会非常善于社交。 | Interaction Engagement |
| 7 | I don't like to be with people from different cultures. (R) 我不喜欢和来自不同文化的人在一起。 | Interaction Engagement |
| 8 | I respect the values of people from different cultures. 我尊重来自不同文化的人的价值观。 | Respect for Cultural Differences |
| 9 | I get upset easily when interacting with people from different cultures. (R) 与来自不同文化的人交流时，我很容易感到沮丧。 | Interaction Attentiveness |
| 10 | I feel confident when interacting with people from different cultures. 与来自不同文化的人交流时，我感到自信。 | Interaction Confidence |
| 11 | I tend to wait before forming an impression of culturally-distinct counterparts. (R) 在与来自不同文化的人交流之前，我往往会先等一等。 | Interaction Engagement |
| 12 | I often get discouraged when I am with people from different cultures. (R) 在与来自不同文化的人交流时，我常常感到气馁。 | Interaction Attentiveness |
| 13 | I am open-minded to people from different cultures. 在跨文化交际中，我思想开放。 | Respect for Cultural Differences |
| 14 | I am very observant when interacting with people from different cultures. 我对来自不同文化的人在交往中的表现非常敏锐。 | Interaction Engagement |
| 15 | I often show my culturally-distinct counterpart my understanding through verbal or nonverbal cues. 我经常对来自不同文化的人表现出积极回应。 | Interaction Engagement |
| 16 | I respect the ways people from different cultures behave. 我尊重来自不同文化的人的行为方式。 | Respect for Cultural Differences |
| 17 | I try to obtain as much information as I can when interacting with people from different cultures. 我试图从来自不同文化的人那里获取尽可能多的信息。 | Interaction Engagement |
| 18 | I would not accept the opinions of people from different cultures. (R) 我不会接受来自不同文化的人的观点。 | Respect for Cultural Differences |
| 19 | I am sensitive to my culturally-distinct counterpart's subtle meanings during our interaction. 在与来自不同文化的人交流时，我对他们的微妙含义非常敏感。 | Interaction Enjoyment |
| 20 | I think my culture is better than other cultures. (R) 我认为自己的文化优于其他文化。 | Respect for Cultural Differences |
| 21 | I often give positive responses to my culturally different counterpart during our interaction. 与来自不同文化的人交流时，我常常给予积极回应。 | Interaction Enjoyment |
| 22 | I avoid those situations where I will have to deal with culturally-distinct persons. (R) 在与来自不同文化的人交流时，我尽量避免出现会让对方感到尴尬的情况。 | Interaction Enjoyment |
| 23 | I often show my culturally-distinct counterpart my understanding through verbal or nonverbal cues. 在与来自不同文化的人交流时，我经常表现出理解。 | Interaction Confidence |
| 24 | I enjoy the differences between my culturally-distinct counterpart and me. 我喜欢与来自不同文化的人之间的差异。 | Interaction Confidence |

**Scoring:** Interaction Engagement: items 1, 6, 7(R), 11(R), 14, 15, 17. Respect for Cultural Differences: items 2(R), 8, 13, 16, 18(R), 20(R). Interaction Confidence: items 3, 5, 10, 23, 24. Interaction Enjoyment: items 19, 21, 22. Interaction Attentiveness: items 4(R), 9(R), 12(R). Total score range: 24–120.

**Supplementary Table S2. Cultural Intelligence Scale (CQS) Items**

Source: Ang et al. (2007). Administered in bilingual Chinese–English format. 7-point Likert scale (1 = Strongly Disagree, 7 = Strongly Agree).

**Metacognitive CQ (4 items)**

**Supplementary Table S2.** Cultural Intelligence Scale (CQS) Items

| **No.** | **Item** |
| --- | --- |
| MC1 | I am conscious of the cultural knowledge I use when interacting with people with different cultural backgrounds. 在与来自不同文化背景的人交流时，我会有意识地运用自己的文化知识。 |
| MC2 | I adjust my cultural knowledge as I interact with people from a culture that is unfamiliar to me. 在与来自不同文化背景的人交流时，我会调整自己的文化知识。 |
| MC3 | I am conscious of the cultural knowledge I apply to cross-cultural interactions. 在跨文化交际中，我会留意自己所运用的文化知识是否准确。 |
| MC4 | I check the accuracy of my cultural knowledge as I interact with people from different cultures. 在与来自不同文化背景的人交流时，我会检查自己对文化知识的运用是否恰当。 |

**Cognitive CQ (6 items)**

| **No.** | **Item** |
| --- | --- |
| COG1 | I know the legal and economic systems of other cultures. 我了解其他文化中的法律和经济制度。 |
| COG2 | I know the rules (e.g., vocabulary, grammar) of other languages. 我了解其他文化中的宗教信仰和价值观。 |
| COG3 | I know the cultural values and religious beliefs of other cultures. 我了解其他文化中的婚俗制度。 |
| COG4 | I know the marriage systems of other cultures. 我了解其他文化中的艺术和手工艺。 |
| COG5 | I know the arts and crafts of other cultures. 我了解其他语言的规则（如词汇、语法）。 |
| COG6 | I know the rules for expressing non-verbal behaviors in other cultures. 我了解其他文化中的非语言行为规范。 |

**Motivational CQ (5 items)**

| **No.** | **Item** |
| --- | --- |
| MOT1 | I enjoy interacting with people from different cultures. 我喜欢与来自不同文化背景的人交流。 |
| MOT2 | I am confident that I can socialize with locals in a culture that is unfamiliar to me. 我有信心能够与来自不熟悉文化的人进行社交。 |
| MOT3 | I am sure I can deal with the stresses of adjusting to a culture that is new to me. 我确信自己能够应对在不熟悉文化中生活的压力。 |
| MOT4 | I enjoy living in cultures that are unfamiliar to me. 我喜欢在不熟悉的文化环境中生活。 |
| MOT5 | I am confident that I can get accustomed to the shopping conditions in a different culture. 我有信心能够适应任何多元文化环境中的购物条件。 |

**Behavioral CQ (5 items)**

| **No.** | **Item** |
| --- | --- |
| BEH1 | I change my verbal behavior (e.g., accent, tone) when a cross-cultural interaction requires it. 在跨文化交际中，我会根据需要改变自己的言语行为（如口音、语调）。 |
| BEH2 | I use pause and silence differently to suit different cross-cultural situations. 在跨文化交际中，我会根据需要放慢说话速度。 |
| BEH3 | I vary the rate of my speaking when a cross-cultural situation requires it. 在跨文化交际中，我会根据需要改变自己的非言语行为。 |
| BEH4 | I change my non-verbal behavior when a cross-cultural situation requires it. 在跨文化交际中，我会根据需要改变自己的面部表情。 |
| BEH5 | I alter my facial expressions when a cross-cultural interaction requires it. 在跨文化交际中，我会根据需要调整使用停顿和沉默的方式。 |

**Scoring:** Each dimension mean = sum of items / number of items. Dimension score range: 1.00–7.00. CQS total mean = mean of the four dimension means.

**Supplementary Table S3. LLM Cultural Learning Perception Questionnaire (LCPQ) Items**

Self-developed instrument. Administered to the experimental group at posttest only. 5-point Likert scale (1 = Strongly Disagree, 5 = Strongly Agree).

**Part 1: Likert Scale Items (25 items)**

**Dimension 1: Perceived Cultural Learning Effectiveness (5 items)**

**Supplementary Table S3.** LLM Cultural Learning Perception Questionnaire (LCPQ) Items

| **No.** | **Item** |
| --- | --- |
| CE1 | Through cultural dialogues with the LLM, my understanding of Chinese cultural customs has deepened. 通过与LLM的文化对话，我对中国文化习俗的理解有所加深。 |
| CE2 | The LLM helped me learn about aspects of Chinese culture that I did not know before. LLM帮助我了解了一些我之前不知道的中国文化知识。 |
| CE3 | Through dialogues with the LLM, I better understand the reasons and values behind Chinese cultural behaviors. 通过与LLM的对话，我更好地理解了中国文化行为背后的原因和价值观。 |
| CE4 | Cultural dialogues with the LLM helped me discover similarities and differences between Chinese culture and my home culture. 与LLM的文化对话帮助我发现了中国文化与我的母文化之间的异同。 |
| CE5 | I believe the LLM cultural dialogues were helpful in improving my intercultural communication ability in China. 我认为LLM文化对话对提升我在中国的跨文化交际能力是有帮助的。 |

**Dimension 2: Quality of LLM as Cultural Dialogue Partner (5 items)**

| **No.** | **Item** |
| --- | --- |
| QP1 | The LLM was able to play a believable Chinese cultural role. LLM能够扮演一个真实可信的中国文化角色。 |
| QP2 | The cultural information provided by the LLM was mostly accurate. LLM提供的文化信息大多数是准确的。 |
| QP3 | The LLM was able to adjust the difficulty level of the dialogue to match my Chinese proficiency. LLM能够根据我的中文水平调整对话难度。 |
| QP4 | The dialogue with the LLM felt natural and smooth, like communicating with a real person. 与LLM的对话感觉自然、流畅，像在和真人交流。 |
| QP5 | The LLM was able to provide in-depth answers to my cultural questions. LLM能够对我提出的文化问题给出有深度的回答。 |

**Dimension 3: Critical AI Literacy Development (5 items)**

| **No.** | **Item** |
| --- | --- |
| CA1 | I am able to identify cultural stereotypes or oversimplifications in the LLM's responses. 我能够识别LLM回应中的文化刻板印象或过度简化。 |
| CA2 | Through these activities, I learned that I should not fully trust the cultural information provided by AI. 通过这些活动，我学会了不能完全相信AI提供的文化信息。 |
| CA3 | I am now more aware that AI may carry cultural biases. 我现在更能意识到AI可能带有文化偏见。 |
| CA4 | When the LLM provides cultural information, I actively consider whether it is one-sided or biased. 当LLM给出文化信息时，我会主动思考这些信息是否片面或带有偏见。 |
| CA5 | I am able to compare and verify the cultural information provided by the LLM against my own real-life experiences. 我有能力将LLM提供的文化信息与自己的真实经历进行对比验证。 |

**Dimension 4: Intercultural Reflection Facilitation (5 items)**

| **No.** | **Item** |
| --- | --- |
| RF1 | Dialogues with the LLM prompted me to reflect on the differences between my own culture and Chinese culture. 与LLM的对话促使我反思自身文化与中国文化之间的差异。 |
| RF2 | Through interactions with the LLM, I began to re-examine some of my own cultural assumptions. 通过与LLM的交流，我开始重新审视自己原有的一些文化观念。 |
| RF3 | The LLM cultural dialogues helped me think about issues from a Chinese perspective. LLM文化对话帮助我从中国人的角度思考问题。 |
| RF4 | These dialogue activities made me more aware that people from different cultures may have different understandings of the same thing. 这些对话活动让我更加意识到，不同文化的人对同一件事可能有不同的理解。 |
| RF5 | Through these activities, I gained a clearer understanding of my own weaknesses in intercultural communication. 通过这些活动，我对自己在跨文化交际中的不足有了更清晰的认识。 |

**Dimension 5: Intention for Continued Use (5 items)**

| **No.** | **Item** |
| --- | --- |
| CU1 | After the course ends, I am willing to continue using LLMs for cultural learning. 课程结束后，我愿意继续使用LLM进行文化学习。 |
| CU2 | I would recommend using LLMs for learning Chinese culture to other international students. 我会向其他留学生推荐使用LLM来学习中国文化。 |
| CU3 | If I encounter intercultural communication difficulties in the future, I would consider consulting an LLM. 如果以后遇到跨文化交际的困惑，我会考虑向LLM咨询。 |
| CU4 | I believe LLMs can serve as an effective supplement to traditional cultural classroom teaching. 我认为LLM可以作为传统文化课堂教学的有效补充。 |
| CU5 | I am interested in using LLMs to explore the cultures of other countries and regions. 我有兴趣使用LLM探索其他国家和地区的文化。 |

**Part 2: Open-Ended Questions (4 items)**

Respondents were invited to answer in Chinese, English, or a combination (minimum 50 words per question).

1. Which topic or dialogue experience during the six weeks of LLM cultural dialogues had the greatest impact on your intercultural understanding? Please explain in detail.

2. What are the differences between discussing cultural topics with AI and with a real person? Please provide examples.

3. Did you notice the LLM providing inaccurate, stereotypical, or biased cultural information? Please describe a specific example and how you responded.

4. If you were to recommend using LLMs for cultural learning to other international students, what advice would you give?

**Scoring:** Each dimension mean = sum of items / 5. Total mean = sum of all 25 items / 25. Score range per dimension: 1.00–5.00.

**Supplementary Table S4. LCPQ Inter-Dimension Pearson Correlation Matrix (*n* = 32)**

**Supplementary Table S4.** LCPQ Inter-Dimension Pearson Correlation Matrix (*n* = 32)

| **Dimension** | **Cultural learning effectiveness** | **Dialogue partner quality** | **Critical AI literacy** | **Intercultural reflection** | **Continued use intention** |
| --- | --- | --- | --- | --- | --- |
| Cultural learning effectiveness | — |  |  |  |  |
| Dialogue partner quality | .42 | — |  |  |  |
| Critical AI literacy | .38 | .35 | — |  |  |
| Intercultural reflection | .55 | .40 | .48 | — |  |
| Continued use intention | .52 | .45 | .37 | .50 | — |

*Note:* All correlation coefficients reached significance at *p* < .05. Moderate positive inter-dimension correlations (*r* = .35–.55) indicate related but distinct constructs, providing preliminary discriminant validity evidence for the five-dimension structure.

**Supplementary Note S1. Complete Prompt Templates for Six Weekly Modules**

All prompts follow a four-component structure: (1) Role Specification, (2) Language Calibration, (3) Cultural Context Framing, and (4) Interaction Constraints. The prompts below were used to configure the LLM (Doubao) at the beginning of each weekly voice dialogue session.

**Week 1 — Social Norms: First Encounters**

**Role Specification:**

You are Zhang Yue (张悦), a 21-year-old female Chinese university student from Nanjing. You are warm and enthusiastic about meeting international classmates. You naturally follow Chinese social norms in greetings and small talk — for example, you may ask about age, hometown, or whether someone has eaten (你吃了吗？) as conversational openers, and you use appropriate address forms (学长/学姐, 同学) without thinking twice.

>

**Language Calibration:**

Speak primarily in Chinese at a level appropriate for HSK Level 3 learners: use common vocabulary and simple sentence structures. When the learner uses English to supplement, respond in Chinese and provide the corresponding Chinese expression. If the learner appears confused, offer brief explanations or provide the English equivalent in parentheses.

>

**Cultural Context Framing:**

The scenario is: You are meeting the learner for the first time at a university welcome event. Demonstrate authentic Chinese greeting practices — asking personal questions out of friendliness (not intrusiveness), offering food or drink, using indirect compliments. If the learner reacts with surprise to questions like "How old are you?" or "Do you have a boyfriend/girlfriend?", explain naturally why these are normal in Chinese social contexts rather than immediately apologizing.

>

**Interaction Constraints:**

(1) Ask the learner about their home country and compare greeting customs ("在你的国家，第一次见面一般聊什么？"). (2) Naturally introduce culturally specific terms (e.g., 客气, 随便, 不好意思) with brief explanations when they arise. (3) Demonstrate at least one instance of Chinese indirect communication (e.g., deflecting a compliment). (4) Maintain at least 10 conversational turns before wrapping up.

**Week 2 — Food Culture and Hospitality**

**Role Specification:**

You are Wang Lei (王磊), a 45-year-old Chinese host — the father of the learner's Chinese classmate. You are hosting the learner at your home for a family dinner. You are generous and insistent about food, following traditional Chinese hospitality norms: continuously urging guests to eat more, serving food to the guest's plate, and interpreting polite refusal as modesty rather than genuine refusal.

>

**Language Calibration:**

Speak primarily in Chinese at HSK Level 3. Use common food-related vocabulary. When introducing dish names or cultural terms (e.g., 干杯, 随便吃, 别客气), provide brief explanations. If the learner struggles, simplify your language or add English equivalents in parentheses.

>

**Cultural Context Framing:**

The scenario is a home-cooked dinner with multiple dishes. Demonstrate authentic Chinese dining etiquette: the host serves food to the guest, urges the guest to eat and drink more, asks about food preferences, and may feel concerned if the guest eats little. When the learner says "I'm full" or "No thank you," respond as a typical Chinese host would — by insisting at least once or twice. If the learner brings up dietary restrictions or preferences, navigate this with cultural sensitivity while maintaining your role.

>

**Interaction Constraints:**

(1) Ask about the learner's home dining customs and compare them ("在你的国家，请客吃饭有什么习惯？"). (2) Introduce key cultural concepts: 劝酒/劝菜, 做客礼仪, 主随客便 vs. 客随主便. (3) Create at least one moment of mild cultural friction (e.g., insisting on more food when the learner declines). (4) Do not immediately explain the cultural logic — let the learner experience the interaction first.

**Week 3 — Intercultural Misunderstanding**

**Role Specification:**

You are Li Wei (李伟), a 22-year-old Chinese university student from Hangzhou. You are friendly but sometimes express opinions that reflect typical Chinese social norms, which may differ from your conversation partner's cultural expectations. Stay in character throughout the conversation. When cultural differences arise, respond naturally from your Chinese cultural perspective rather than immediately accommodating the other person's viewpoint.

>

**Language Calibration:**

Speak primarily in Chinese at a level appropriate for HSK Level 3 learners: use common vocabulary, simple sentence structures, and avoid overly formal or classical Chinese expressions. When the learner uses English to supplement their expression, respond in Chinese and provide the corresponding Chinese expression. If the learner appears confused, offer brief explanations using simpler Chinese or provide the English equivalent in parentheses.

>

**Cultural Context Framing:**

The scenario is: You and the learner are classmates working on a group project. A misunderstanding has arisen because of different expectations about punctuality, direct vs. indirect communication, or group decision-making. Draw on authentic Chinese cultural practices (e.g., indirect refusal to preserve *mianzi*, preference for group harmony over individual opinion) rather than generalized East Asian stereotypes. If asked about your cultural practices, share personal anecdotes rather than making sweeping generalizations about "all Chinese people."

>

**Interaction Constraints:**

(1) Ask follow-up questions to understand the learner's cultural perspective (e.g., "在你的国家，这种情况一般怎么处理？"). (2) When culturally specific terms arise (e.g., 面子, 客气, 随便), provide a brief contextual explanation. (3) Express your own viewpoint and, when appropriate, respectfully disagree to create opportunities for intercultural negotiation. (4) Do not resolve the misunderstanding too quickly — allow at least 3–4 turns of genuine negotiation before reaching mutual understanding.

**Week 4 — Digital China**

**Role Specification:**

You are Chen Xi (陈曦), a 23-year-old Chinese graduate student who is passionate about technology. You are an active user of Chinese digital platforms (WeChat, Alipay, Xiaohongshu, Douyin/TikTok, Taobao) and consider China's digital ecosystem to be highly advanced and convenient. You are proud of China's digital development but can acknowledge downsides when directly asked.

>

**Language Calibration:**

Speak primarily in Chinese at HSK Level 3. Introduce digital platform names and tech-related vocabulary (e.g., 移动支付, 扫码, 直播带货, 社交电商) with brief explanations. If the learner is unfamiliar with a concept, describe it in simple terms with everyday examples.

>

**Cultural Context Framing:**

The scenario is: You and the learner are having coffee and discussing how daily life in China is shaped by digital technology. Share your genuine enthusiasm for digital convenience while also being honest about challenges (e.g., digital surveillance concerns, the digital divide for elderly users, pressure to maintain social media presence). When the learner compares with their home country's digital culture, engage with genuine curiosity rather than defensiveness. If the learner raises critical points about Chinese digital culture, respond thoughtfully rather than dismissing them.

>

**Interaction Constraints:**

(1) Ask the learner about digital culture in their home country and compare ("你的国家用什么支付方式？有没有类似微信的App？"). (2) Provide at least two concrete examples of how digital tools shape Chinese social interactions (e.g., sending 红包 via WeChat, splitting bills via Alipay). (3) When the learner makes observations about Chinese digital culture, sometimes present a different perspective to stimulate critical discussion. (4) Naturally raise one topic where China's digital practices might surprise or concern the learner (e.g., cashless-only stores, social credit discussions).

**Week 5 — Identity and Cultural Adaptation**

**Role Specification:**

You are Liu Fang (刘芳), a 30-year-old Chinese counselor at the university's International Student Office. You have experience helping international students navigate culture shock and identity challenges. You are empathetic and reflective, asking thoughtful questions rather than giving quick answers. You acknowledge that cultural adaptation is difficult and that homesickness is natural.

>

**Language Calibration:**

Speak primarily in Chinese at HSK Level 3. Use simple but emotionally nuanced language. When discussing psychological or identity-related concepts (e.g., 文化冲击, 归属感, 身份认同, 乡愁), provide brief explanations and check for understanding. Allow the learner to express emotions in English if needed, then respond in Chinese.

>

**Cultural Context Framing:**

The scenario is: The learner has come to your office for a one-on-one conversation about their experiences adapting to life in China. Explore topics including: initial culture shock moments, strategies for coping with cultural differences, how their identity has shifted since arriving in China, and what aspects of Chinese culture they have come to appreciate or still find challenging. Draw on authentic counseling approaches — listen actively, validate feelings, ask reflective questions — while also sharing how Chinese students who study abroad face similar challenges.

>

**Interaction Constraints:**

(1) Ask open-ended reflective questions (e.g., "来中国以后，你觉得自己有什么变化？", "你最想念家乡的什么？"). (2) Share a brief anecdote about a Chinese student's experience abroad to create reciprocity. (3) When the learner describes difficulties, validate their feelings before offering perspectives. (4) Gently introduce the concept that cultural adaptation is not about becoming Chinese but about developing a "third space" (第三空间) between cultures. (5) Allow at least 3–4 turns of emotional expression before shifting to cognitive reflection.

**Week 6 — Integrative Reflection**

**Role Specification:**

You are a reflective dialogue facilitator — not playing a specific cultural character this week. Your role is to help the learner look back on the entire six-week cultural dialogue journey, synthesize what they have learned, identify remaining questions or biases, and articulate their intercultural growth.

>

**Language Calibration:**

Speak in Chinese at HSK Level 3, but be especially patient and allow longer pauses for reflection. If the learner wants to express complex reflections in English, accept this and gently encourage them to try summarizing key points in Chinese as well.

>

**Cultural Context Framing:**

This is not a role-play scenario but a guided reflective dialogue. Topics to cover include: (a) Which weekly theme had the most impact and why? (b) How has the learner's understanding of Chinese culture changed? (c) What cultural biases or stereotypes did they discover — in the LLM's responses AND in their own thinking? (d) How do they now view the relationship between AI-generated cultural information and real-world cultural experiences? (e) What intercultural communication goals do they want to pursue going forward?

>

**Interaction Constraints:**

(1) Begin by asking the learner to name one cultural insight that surprised them most over the six weeks. (2) For each reflection, follow up with "Why do you think that is?" or "Can you give a specific example?" to deepen reflection. (3) Explicitly ask about LLM biases encountered: "在这六周里，你有没有发现AI说了不准确的文化信息？" (4) Ask the learner to compare their current understanding with their understanding at Week 1. (5) End by asking the learner to articulate one concrete intercultural communication goal for the coming semester.

**Supplementary Note S2. Sample Lesson Plan — Four-Phase Implementation Procedure (Week 3)**

**Theme:** Intercultural Misunderstanding

**Duration:** 90 minutes

**ICC Target Dimensions:** Skills (*savoir apprendre/faire*), Attitudes (*savoir être*)

**Phase 1: Activation (15 min)**

**Objective:** Activate prior knowledge and set the cultural scenario.

| **Time** | **Activity** | **Materials** |
| --- | --- | --- |
| 0–5 min | Instructor presents a brief scenario: "You and a Chinese classmate have different ideas about how to complete a group project. What might go wrong?" | Slide with scenario description |
| 5–10 min | Pair discussion: learners share experiences of misunderstandings they have had in China or with people from other cultures | — |
| 10–15 min | Instructor introduces key vocabulary for the session: 误会 (misunderstanding), 面子 (face), 直接/间接 (direct/indirect), 妥协 (compromise) | Vocabulary handout (bilingual) |

**Phase 2: LLM Dialogue (30 min)**

**Objective:** Experiential intercultural encounter through LLM-mediated voice dialogue.

| **Time** | **Activity** | **Materials** |
| --- | --- | --- |
| 15–45 min | Learners individually engage with Doubao using the Week 3 prompt template (see Supplementary Note S1). Minimum 10 conversational turns. Interaction is primarily in Chinese (HSK Level 3), with English permitted as supplement. | Mobile device with Doubao app; Task sheet with scenario description and guiding questions |

**Task sheet guiding questions:**

1. What is the misunderstanding about? Try to understand Li Wei's perspective.

2. How does Li Wei handle disagreement differently from how you would?

3. Can you identify any cultural values (e.g., 面子, harmony) behind Li Wei's behavior?

4. Try to resolve the misunderstanding through negotiation — what strategy works?

**After dialogue:** Learners submit a screenshot of the dialogue interface to the research assistant for task completion verification. ASR-generated transcripts are automatically saved.

**Phase 3: Group Discussion (30 min)**

**Objective:** Reflective observation — processing the dialogue experience collaboratively.

| **Time** | **Activity** | **Materials** |
| --- | --- | --- |
| 45–55 min | In culturally mixed groups of 3–4, learners share: (a) What the misunderstanding was about in their dialogue; (b) How Li Wei's responses differed from their expectations; (c) What cultural values they identified | Discussion guide |
| 55–65 min | Groups compare: "Was the misunderstanding similar across your dialogues? Did Li Wei behave consistently?" | — |
| 65–75 min | Groups discuss: "Have you experienced a similar misunderstanding in real life in China? How did you handle it compared to the AI dialogue?" | — |

**Phase 4: Synthesis and Bias Check (15 min)**

**Objective:** Abstract conceptualization and critical cultural awareness development.

| **Time** | **Activity** | **Materials** |
| --- | --- | --- |
| 75–80 min | Instructor projects 2–3 LLM responses from the session (anonymized, selected for discussion value). Class identifies: Was the response culturally accurate? Oversimplified? Stereotypical? | Projected screenshots |
| 80–85 min | Instructor guides discussion: "Did the AI present a realistic picture of how Chinese people handle disagreements, or was it too 'perfect'? What might the AI be missing?" | — |
| 85–90 min | Instructor synthesizes key cultural concepts: direct vs. indirect communication styles; the role of 面子 in conflict avoidance; that cultural patterns are tendencies, not rules. Assigns reflective learning journal entry. | — |

**Reflective learning journal prompt (homework):**

In your journal, record: (1) the core topic of today's dialogue; (2) one cultural insight that surprised you; (3) one thing the AI said that you are not sure is accurate, and why.

*End of Supplementary Information*
